# Supplementary material
Source: MDPI journal article supplement (https://www.mdpi.com/2071-1050/15/9/7288)
Supplement: s1 [file s1]

## Supplementary Material

for the manuscript

### **Moringa oleifera seed addition prior to sludge thickening for supernatant quality improvement: analyses of clarification performance and toxicity**

Tables S1 and S2

**Table S1.** Sludge volume index (SVI) and zone settling rate (ZSR) of sludge after 30 min of settling at varying dosages of MO.

| MO dosage (g/L) | SVI (mL/g) |                    | ZSR (cm/min) |                    |
|-----------------|------------|--------------------|--------------|--------------------|
|                 | Average    | Standard deviation | Average      | Standard deviation |
| Control (0)     | 50         | ± 16               | 0.15         | ±0.12              |
| 0.2             | 50         | ± 15               | 0.14         | ±0.12              |
| 0.4             | 45         | ± 16               | 0.15         | ±0.18              |
| 0.6             | 53         | ± 20               | 0.17         | ±0.10              |
| 0.8             | 52         | ± 19               | 0.17         | ±0.07              |
| 1.0             | 52         | ± 19               | 0.18         | ±0.08              |
| 1.2             | 58         | ± 16               | 0.17         | ±0.10              |
| 1.4             | 61         | ± 15               | 0.19         | ±0.08              |

**Table S2.** Influence of increasing MO dosage on the pH and electrical conductivity of the supernatant of thickened sludge.

| MO dosage (g/L) | pH      |                    | Electrical conductivity (µS/cm) |                    |
|-----------------|---------|--------------------|---------------------------------|--------------------|
|                 | Average | Standard deviation | Average                         | Standard deviation |
| Control (0)     | 7.6     | ± 0.1              | 1,147                           | ± 125              |
| 0.2             | 7.7     | ± 0.1              | 1,111                           | ± 152              |
| 0.4             | 7.6     | ± 0.1              | 1,132                           | ± 143              |
| 0.6             | 7.6     | ± 0.1              | 1,161                           | ± 138              |
| 0.8             | 7.6     | ± 0.1              | 1,161                           | ± 149              |
| 1.0             | 7.5     | ± 0.1              | 1,143                           | ± 127              |
| 1.2             | 7.5     | ± 0.1              | 1,184                           | ± 62               |
| 1.4             | 7.5     | ± 0.1              | 1,134                           | ± 143              |
